# Supplementary figures and images for: Chemical modification method determines the formation of starch-iodine complex: an insight into the lamellar structure and iodine adsorption behavior
Source: Research Square preprint supplement (doi:10.21203/rs.3.rs-7266117/v1), 2025-08-14

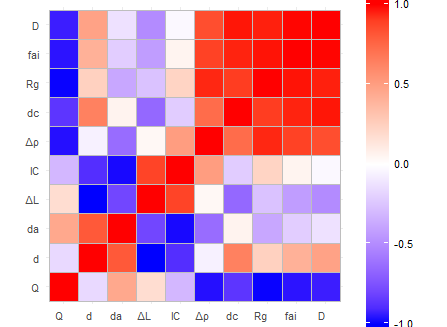


**Fig. S1.** Correlation analysis of lamellar structural parameters and iodine binding capacity

Supplement: Supplementary file 1 [file 1ce24634acac5af0136058d9.docx]
